# Supplementary material
Source: PubMed Central journal article supplement (PMC7115403)

Vaccine Tsai et al Figure S1

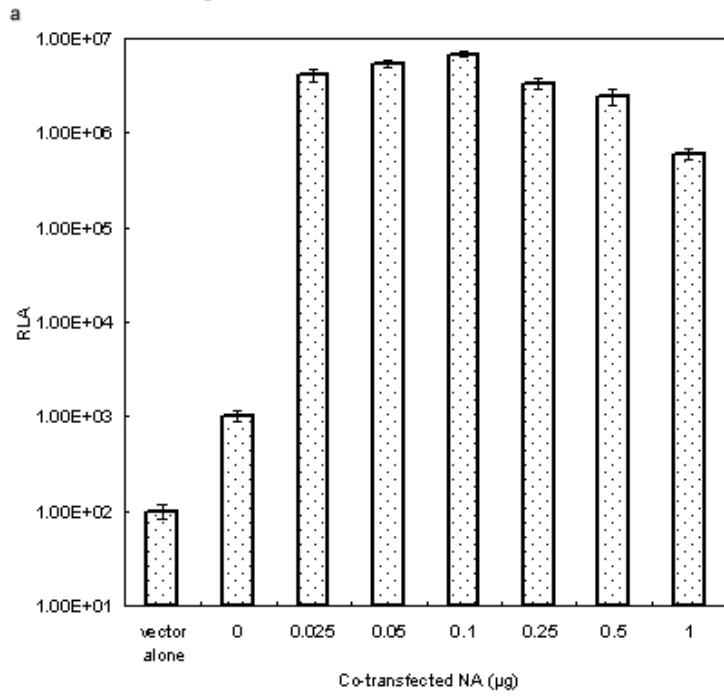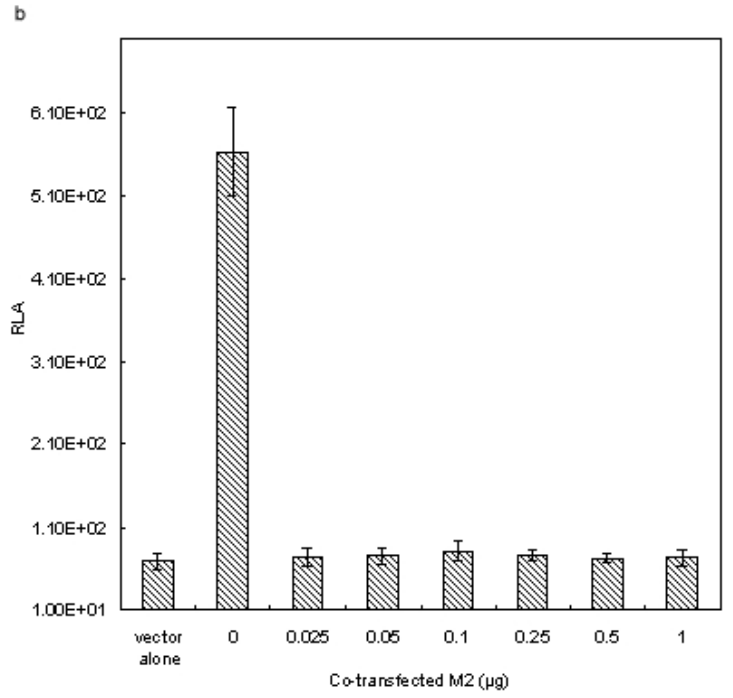

Vaccine Tsai et al Figure S2

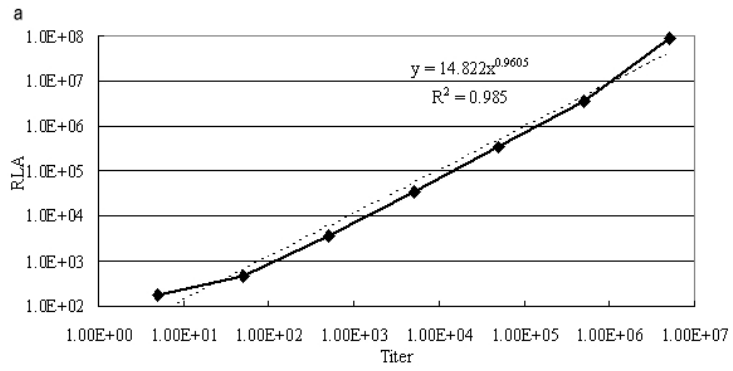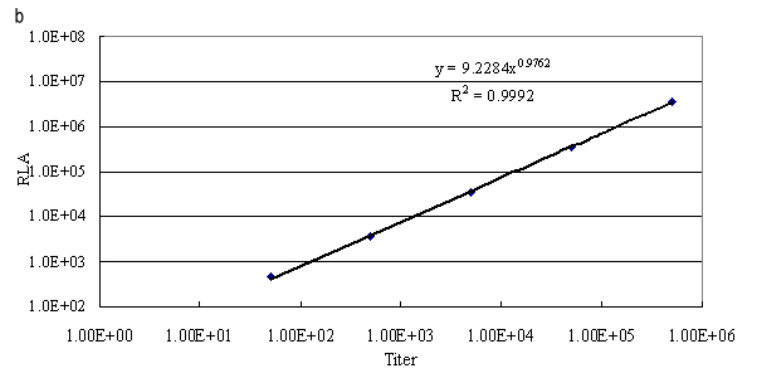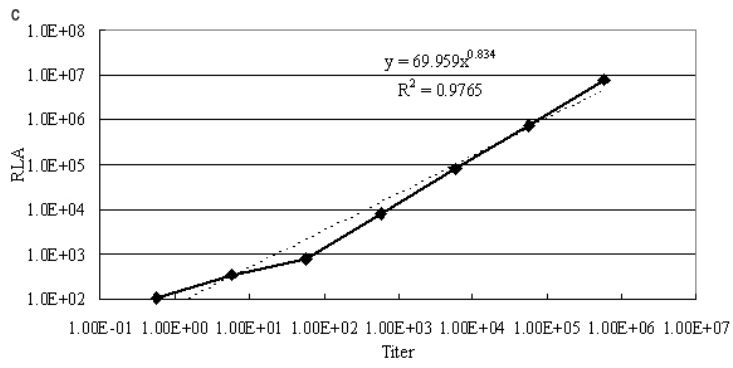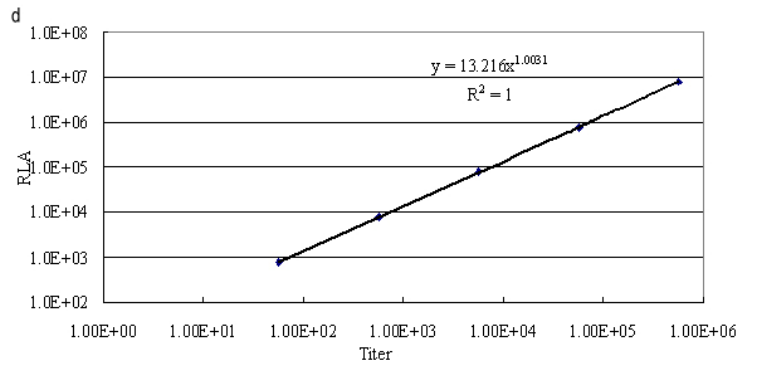

Vaccine Tsai et al Figure S3  
Mock infection

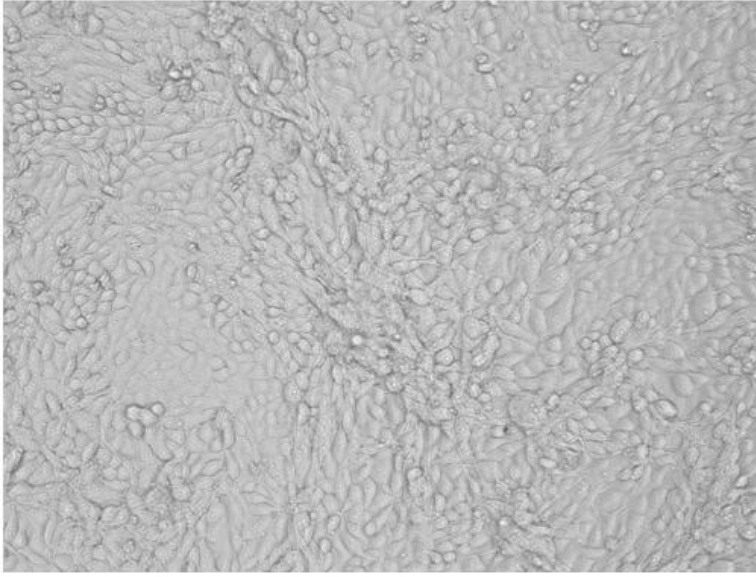

virus

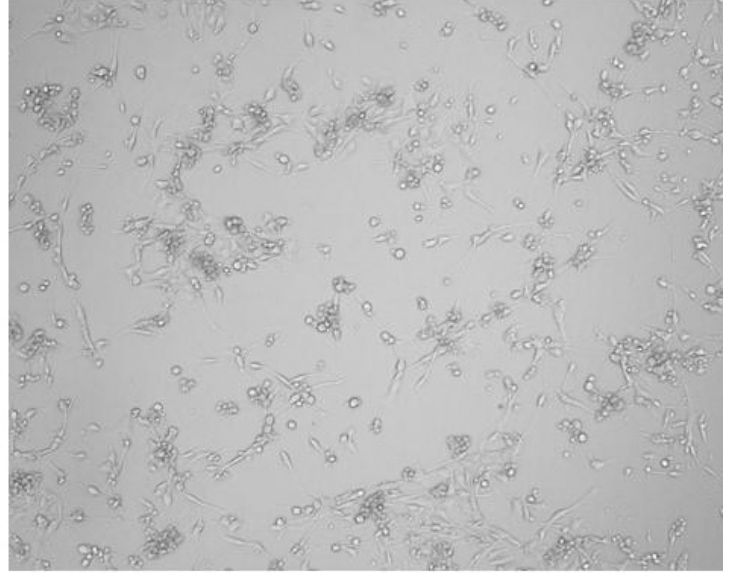

a 1:10

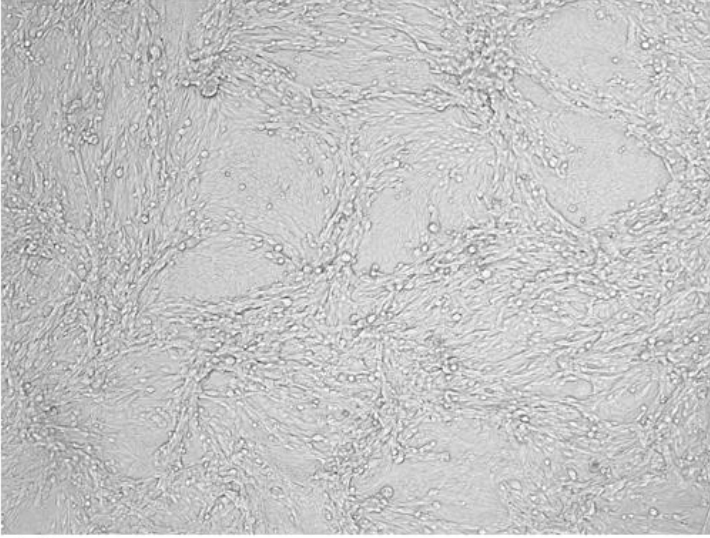

1:20

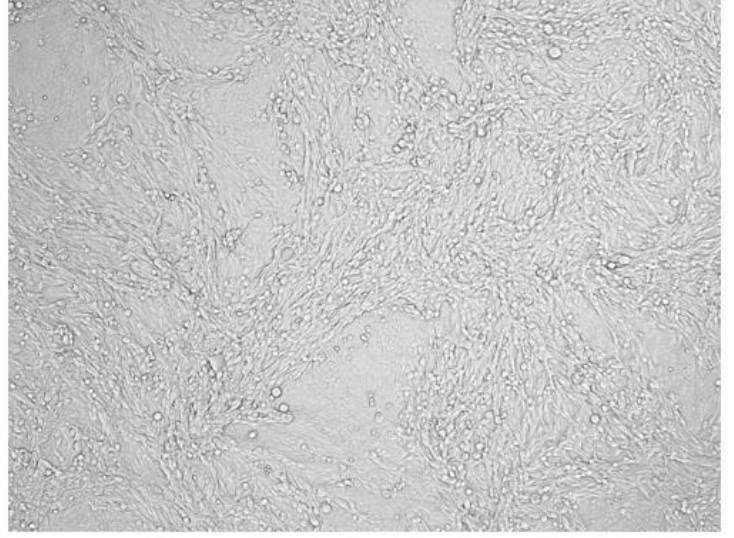

1:40

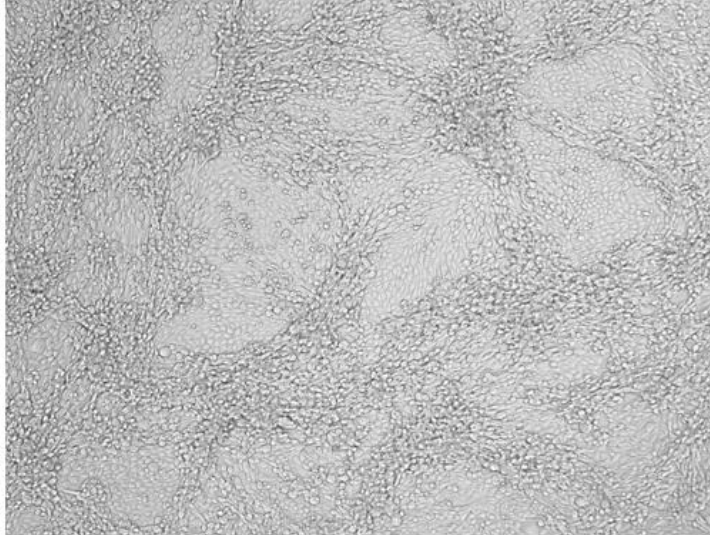

1:80

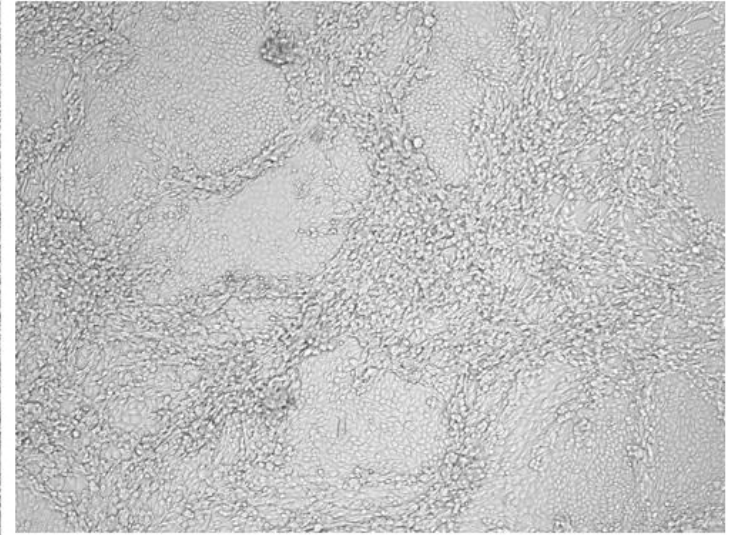



a 1:160

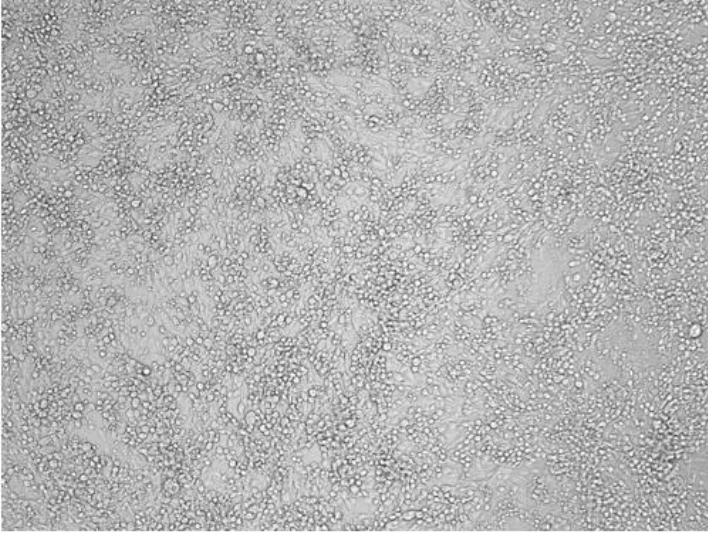

1:320

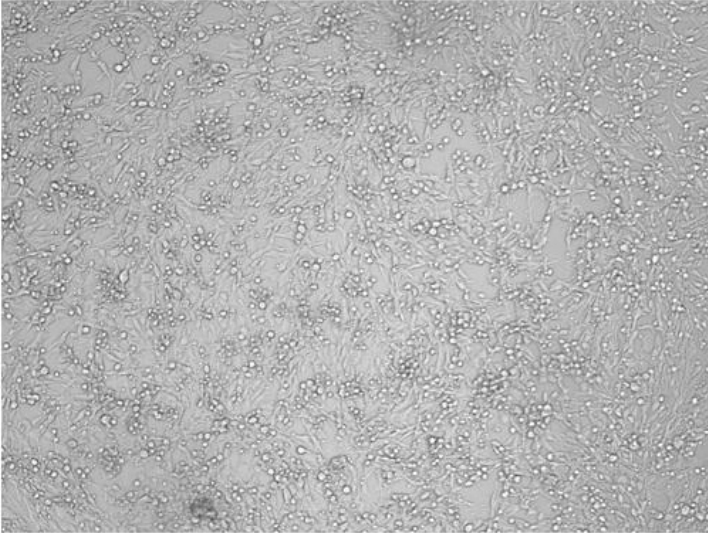

1:640

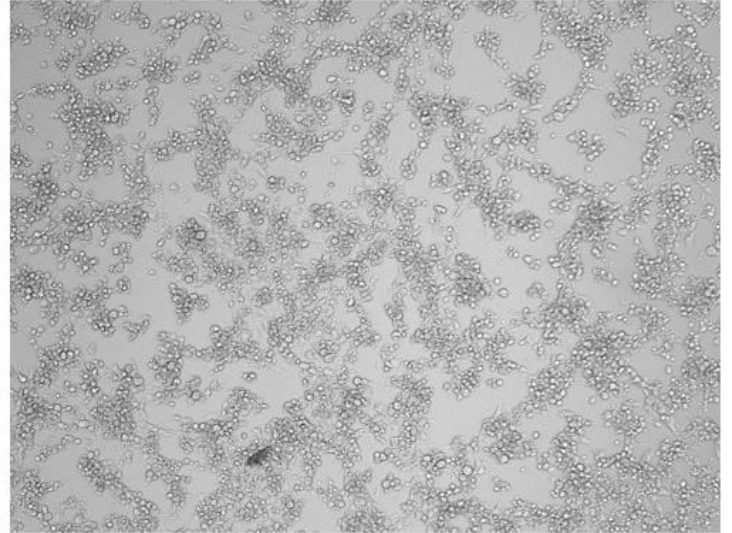

b 1:10

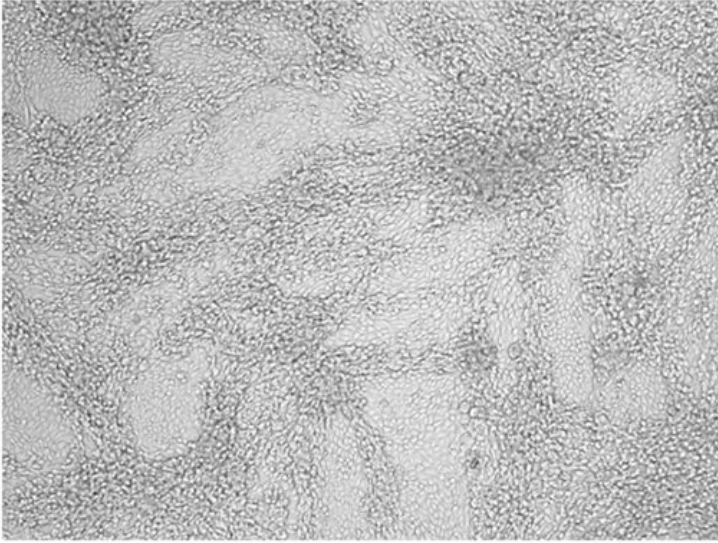

1:20

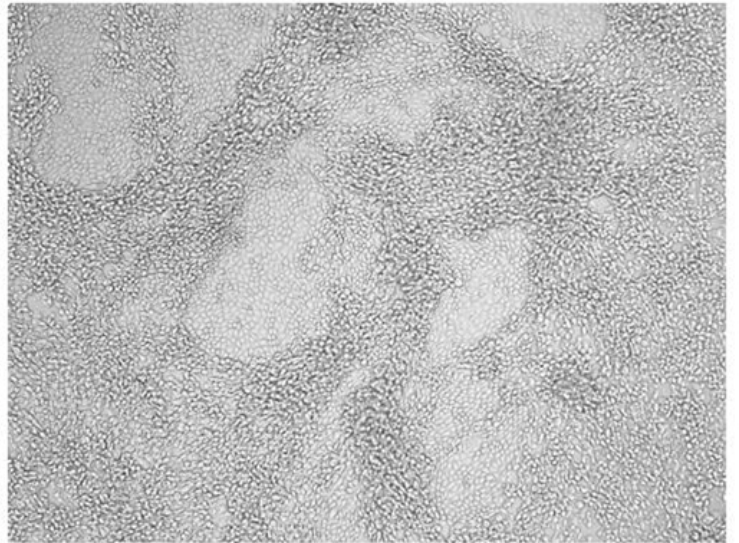

1:40

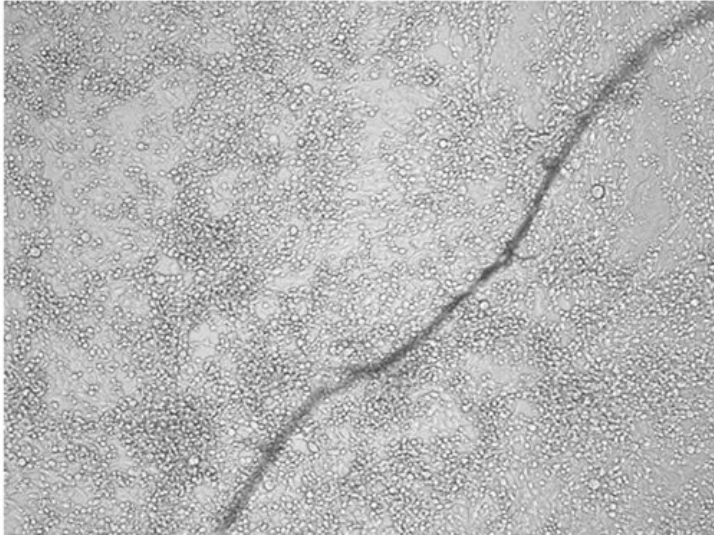

1:80

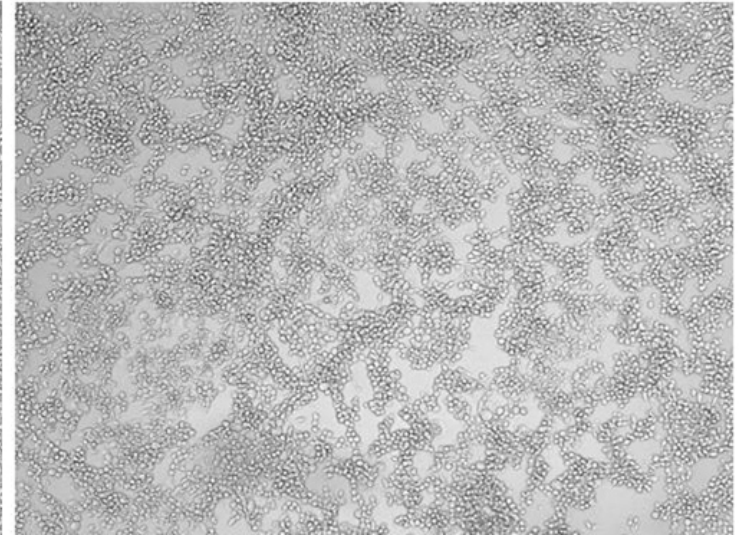



b 1:160

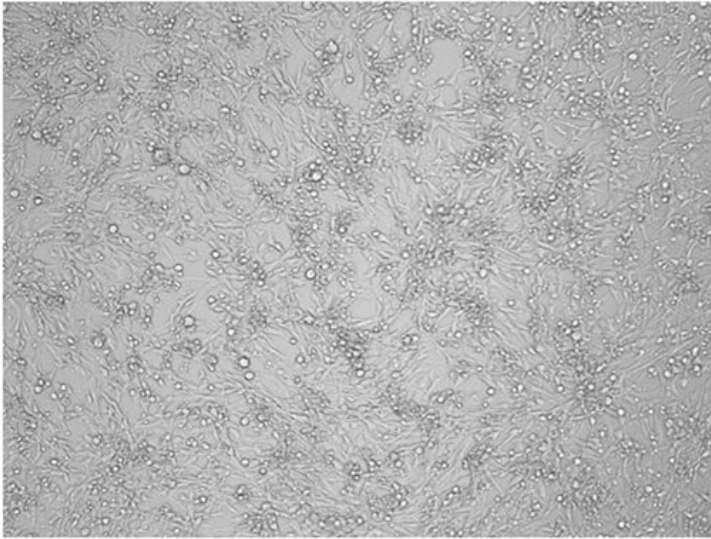

1:320

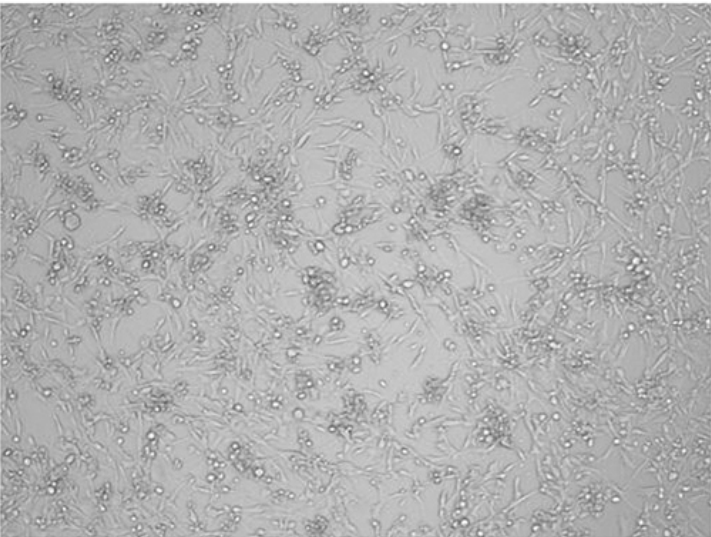

1:640

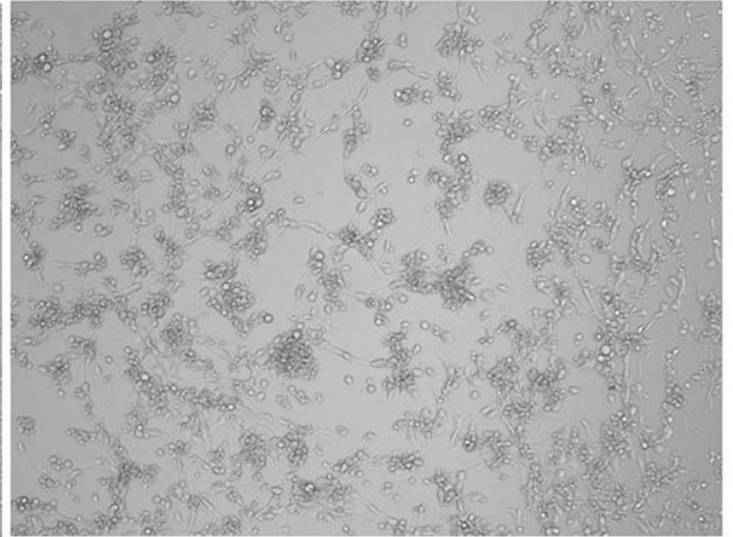

Supplement: mmc1.pdf [file mmc1.pdf]
